# Supplementary material
Source: bioRxiv or medRxiv preprint supplement (http://medrxiv.stage.highwire.org/highwire/filestream/97263/field_highwire_adjunct_files/1/2020.09.15.20195545-2.pdf)

Infliximab use (% of hospitalized patients with COVID-19) by month

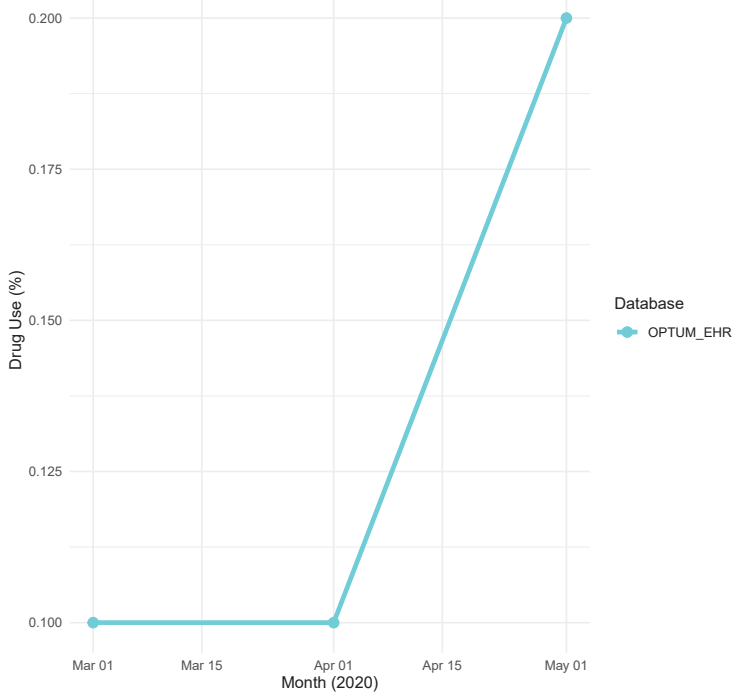

Famotidine use (% of hospitalized patients with COVID-19) by month

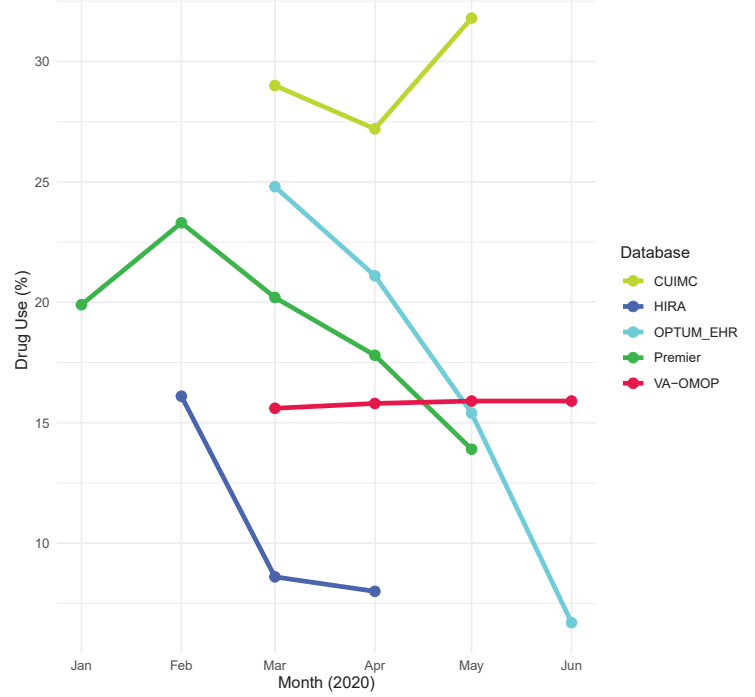

Colchicine use (% of hospitalized patients with COVID-19) by month

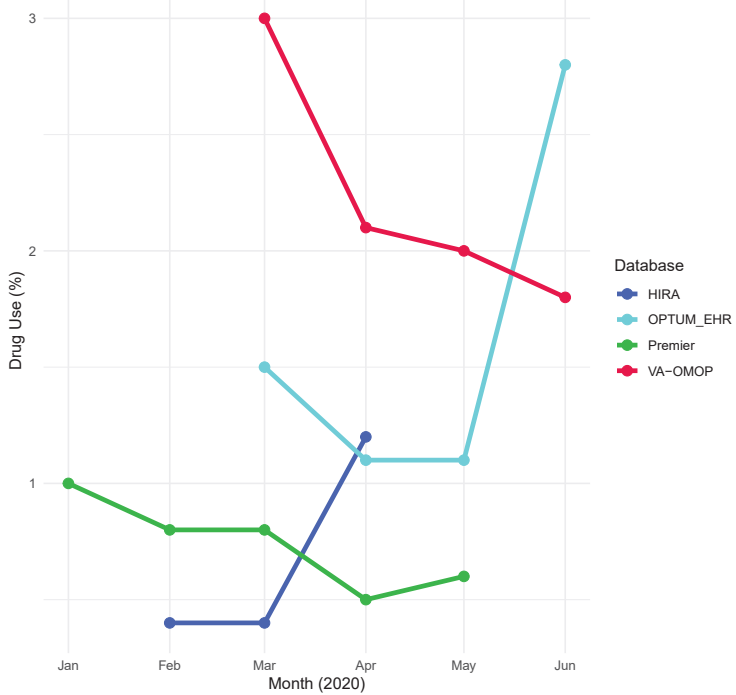

Aspirin use (% of hospitalized patients with COVID-19) by month

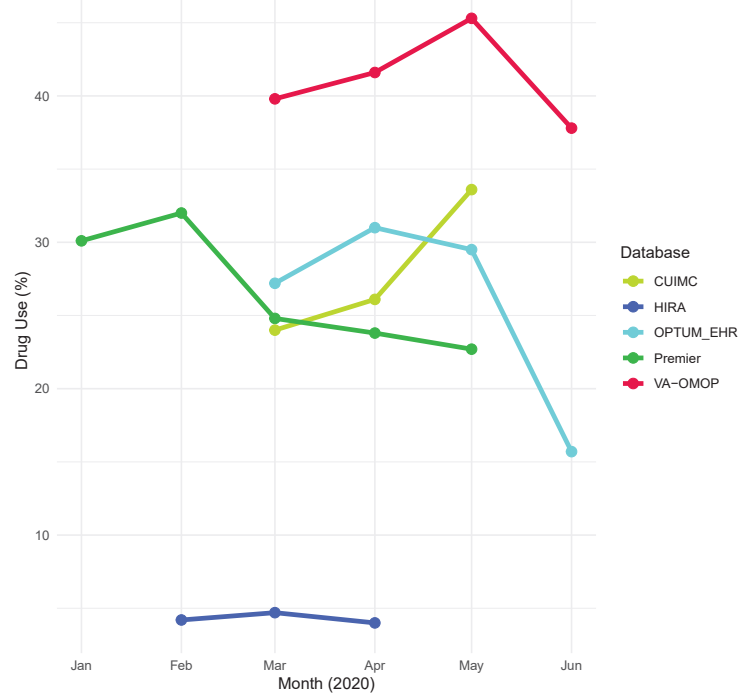

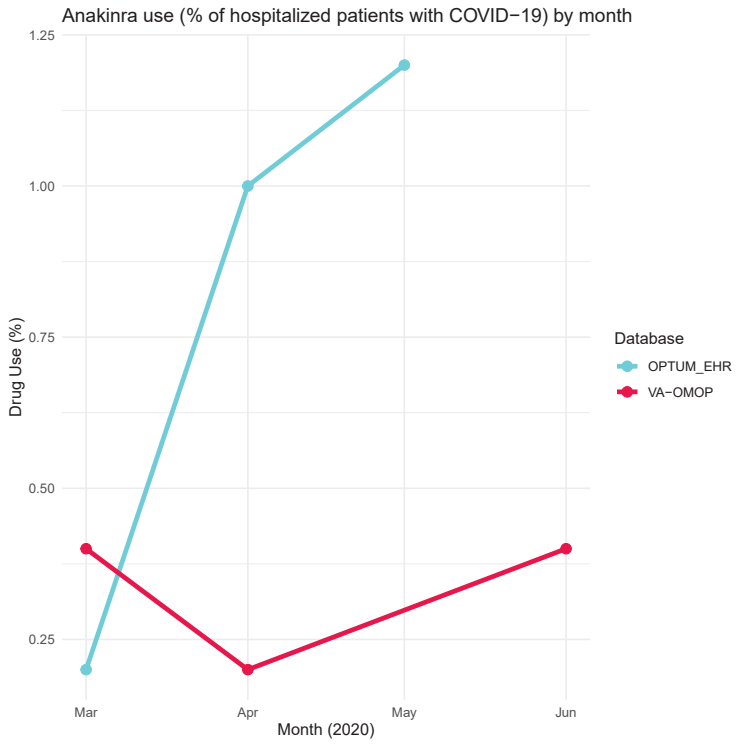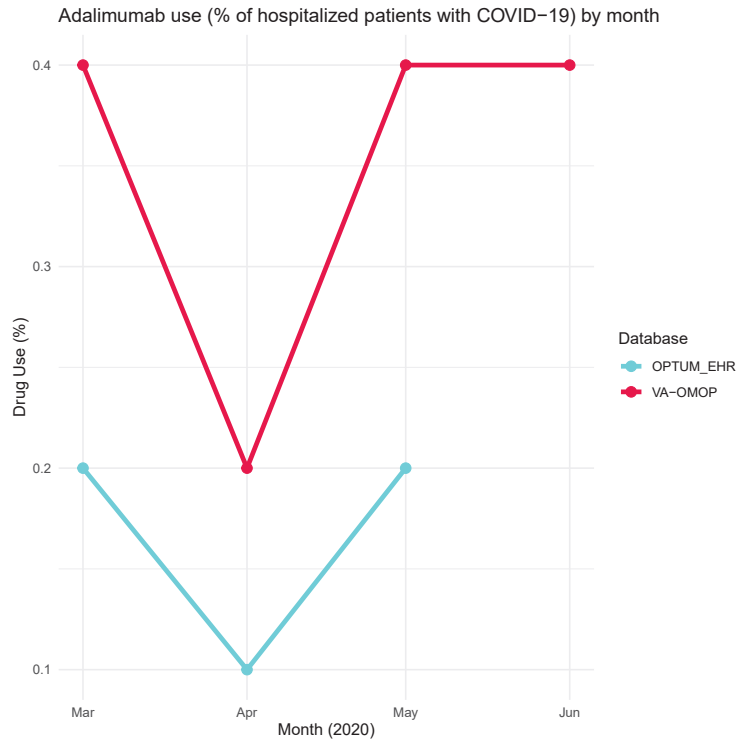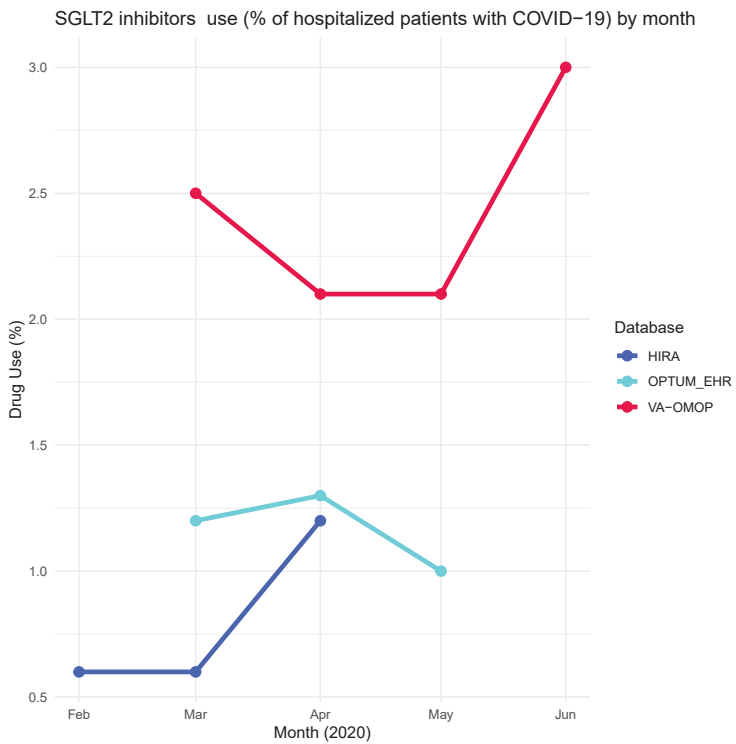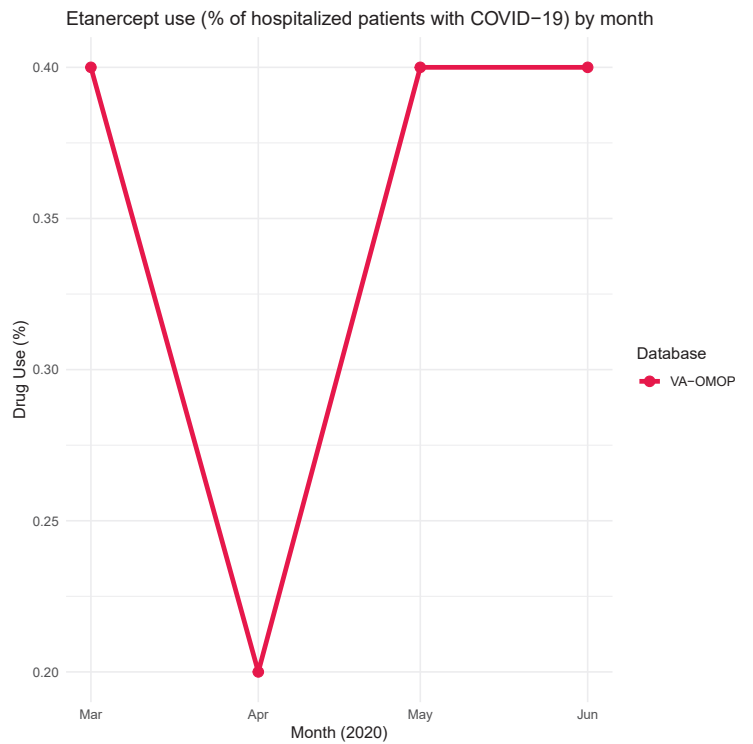

Enoxaparin use (% of hospitalized patients with COVID-19) by month

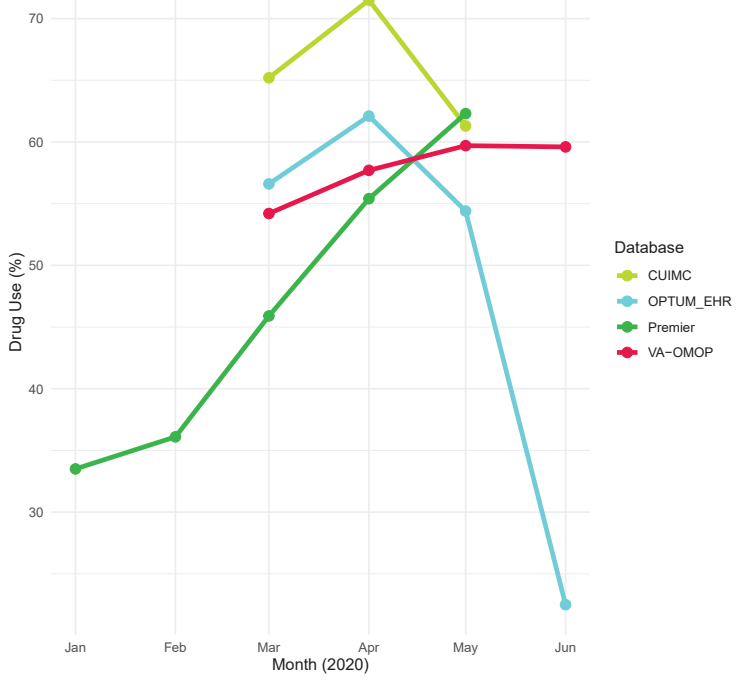

Tranexamic acid use (% of hospitalized patients with COVID-19) by month

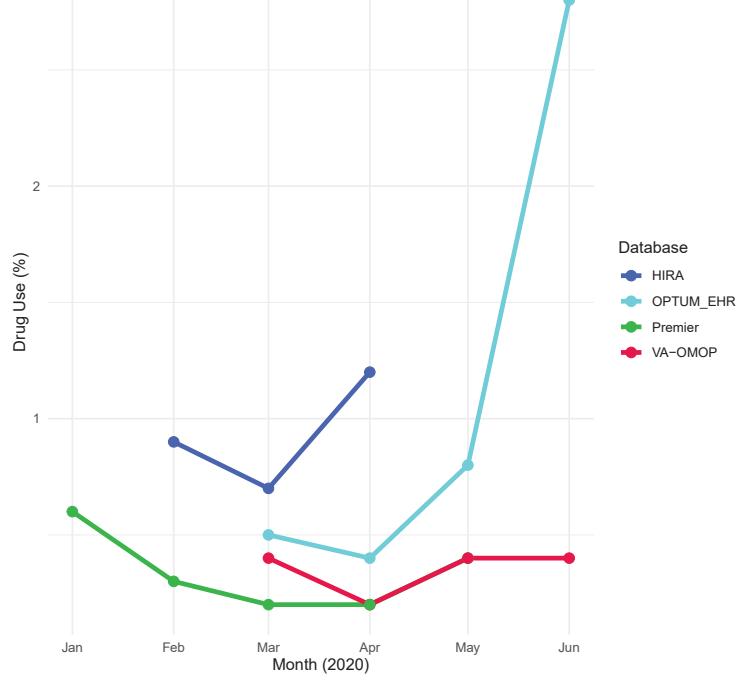

Warfarin use (% of hospitalized patients with COVID-19) by month

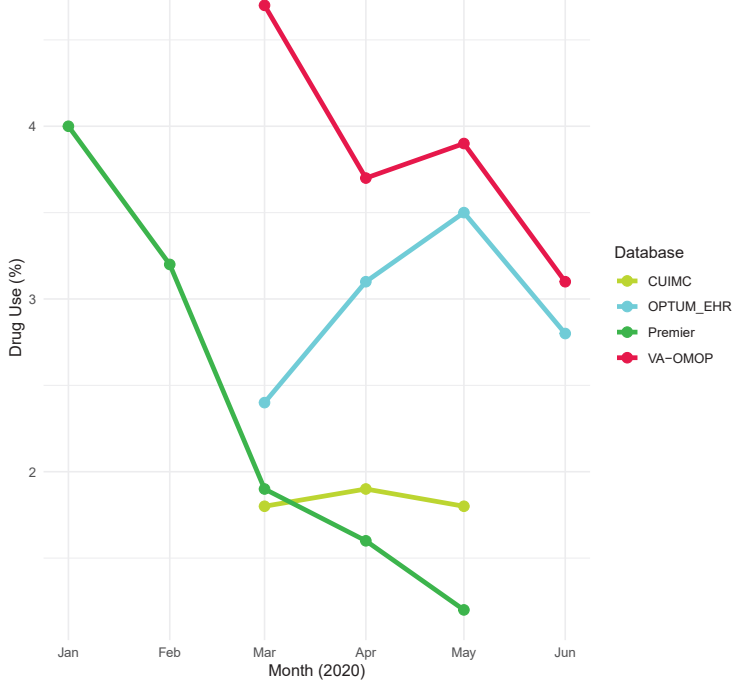

Clopidogrel use (% of hospitalized patients with COVID-19) by month

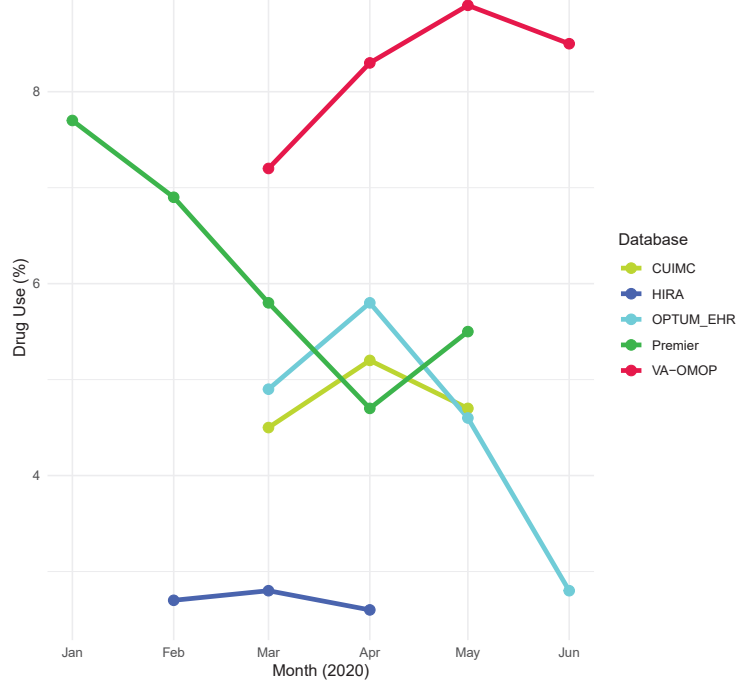

Cilostazol use (% of hospitalized patients with COVID-19) by month

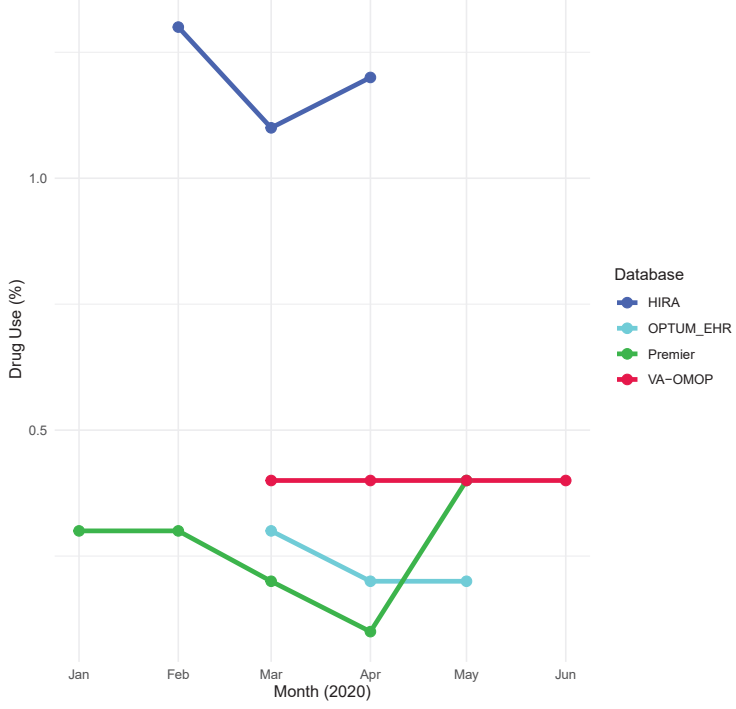

Prazosin use (% of hospitalized patients with COVID-19) by month

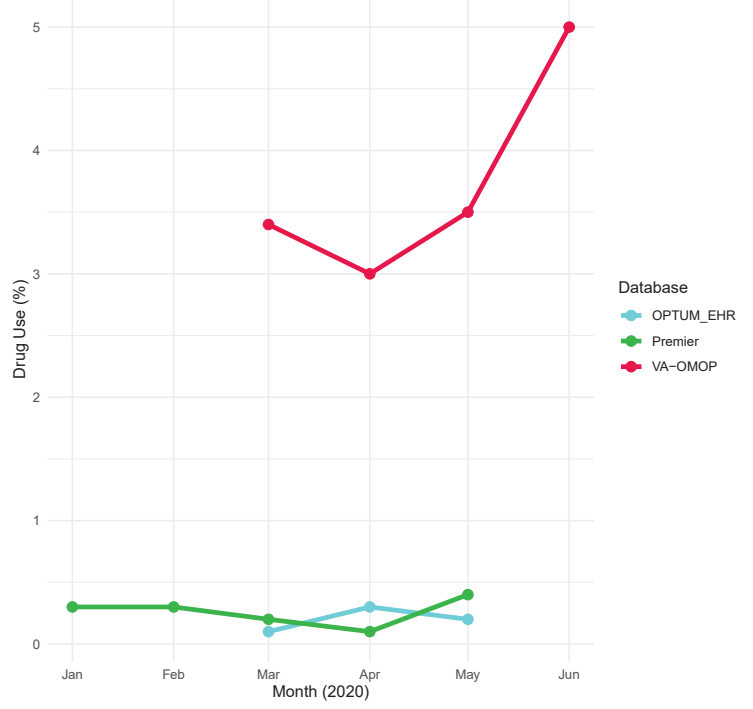

Losartan use (% of hospitalized patients with COVID-19) by month

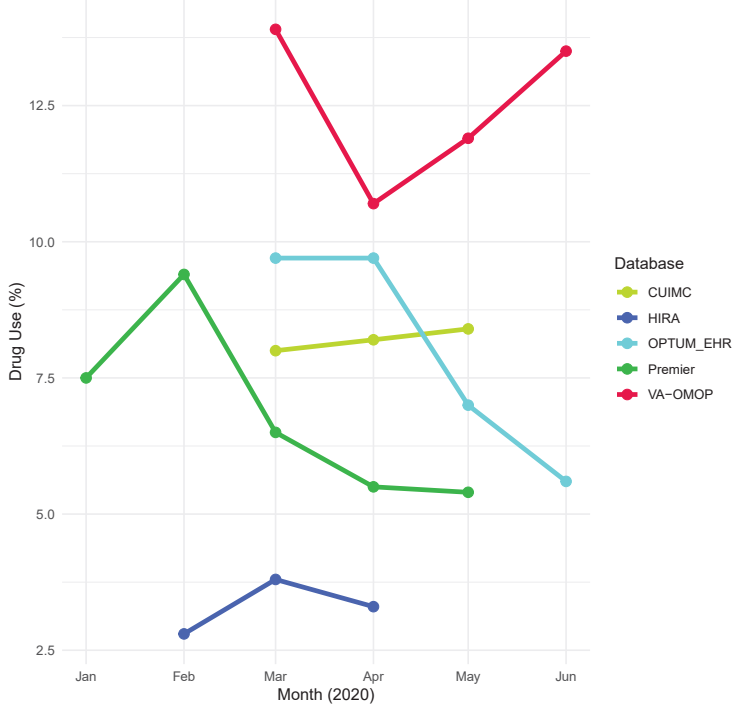

Heparin use (% of hospitalized patients with COVID-19) by month

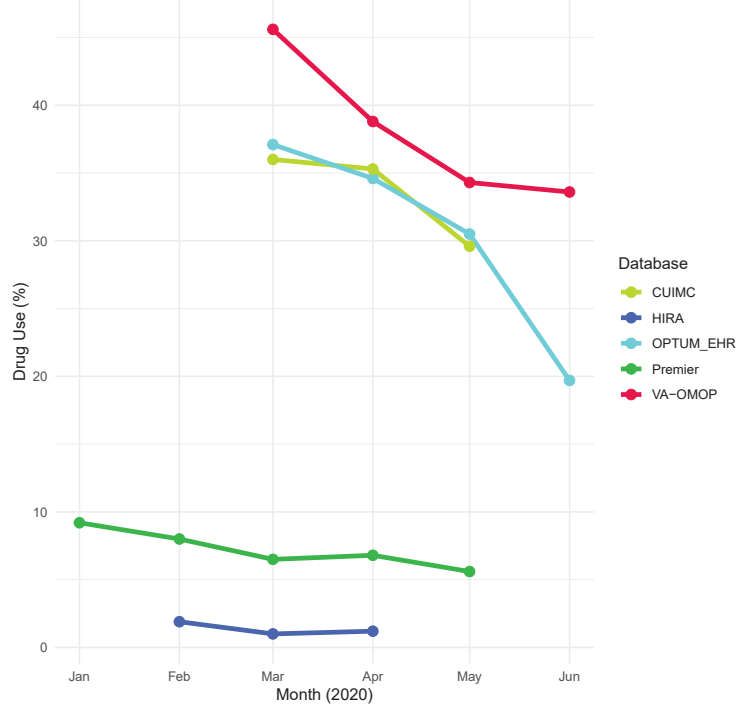

Metformin use (% of hospitalized patients with COVID-19) by month

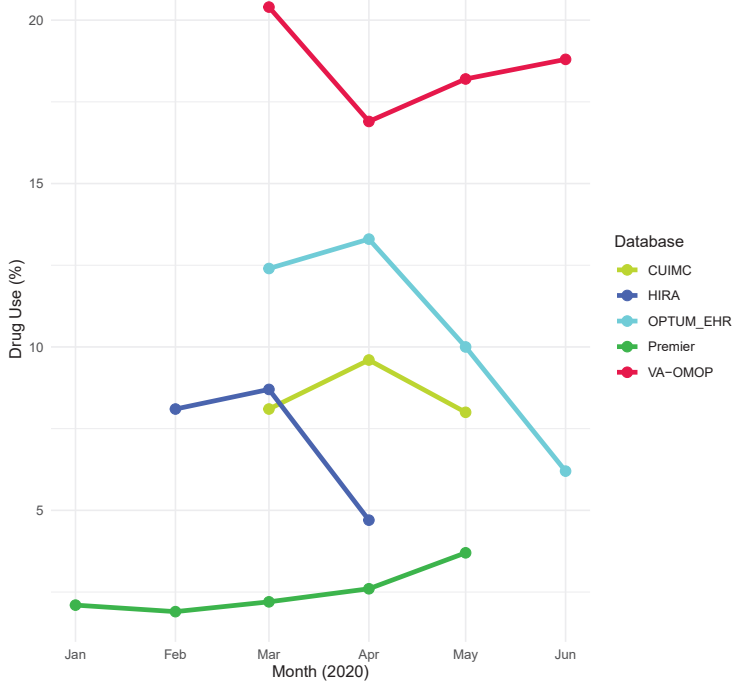

Dexamethasone use (% of hospitalized patients with COVID-19) by month

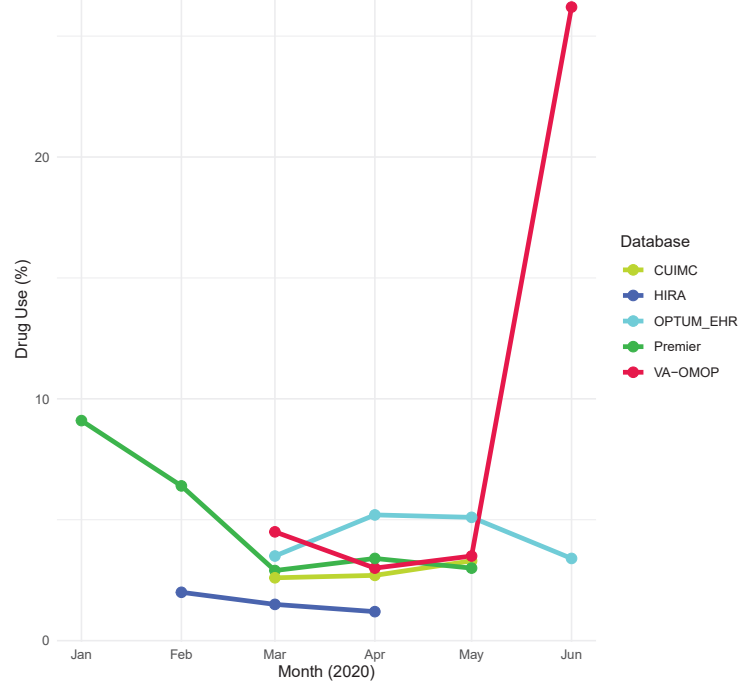

Sitagliptin use (% of hospitalized patients with COVID-19) by month

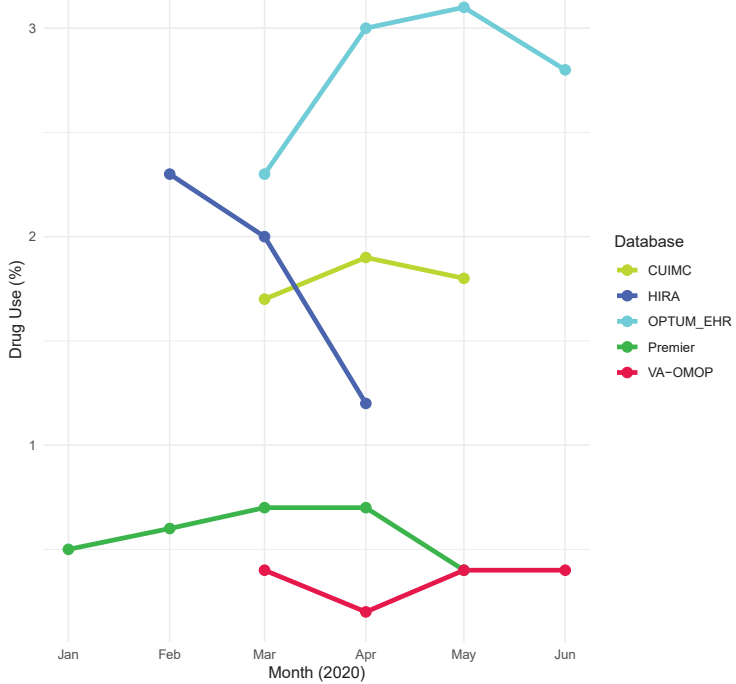

Amoxicillin use (% of hospitalized patients with COVID-19) by month

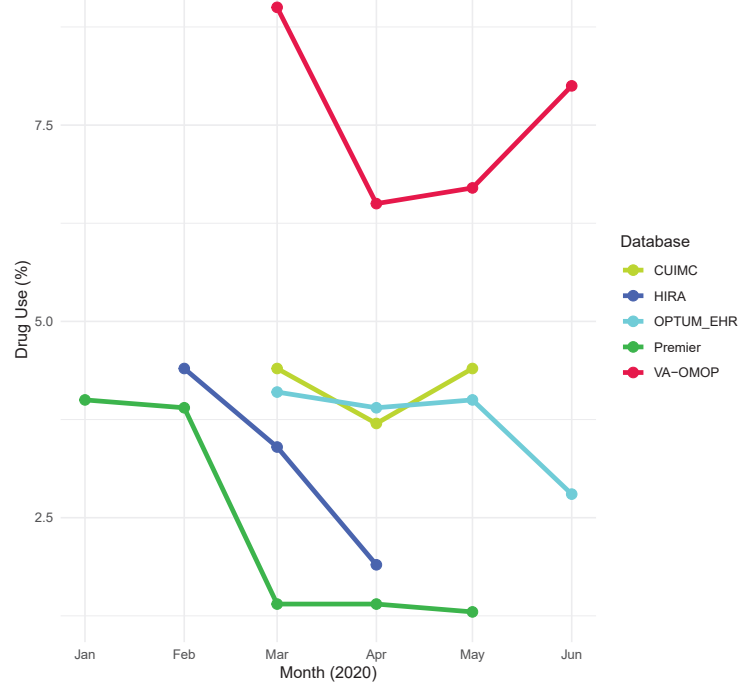

Azithromycin use (% of hospitalized patients with COVID-19) by month

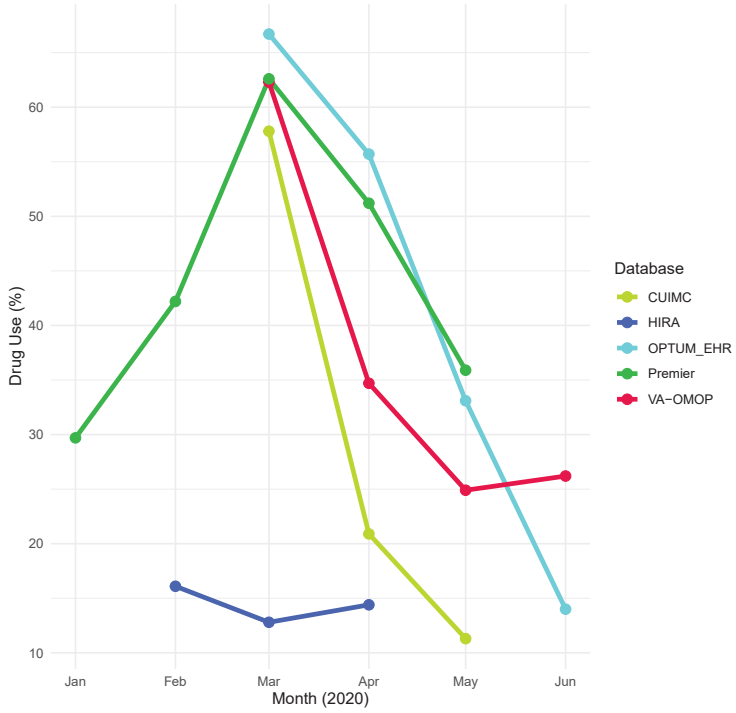

Lopinavir use (% of hospitalized patients with COVID-19) by month

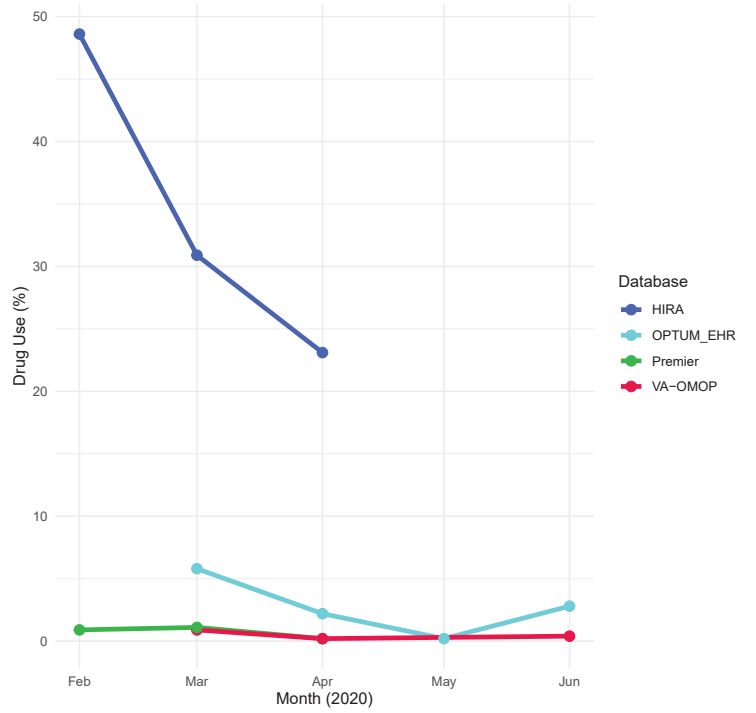

Ritonavir use (% of hospitalized patients with COVID-19) by month

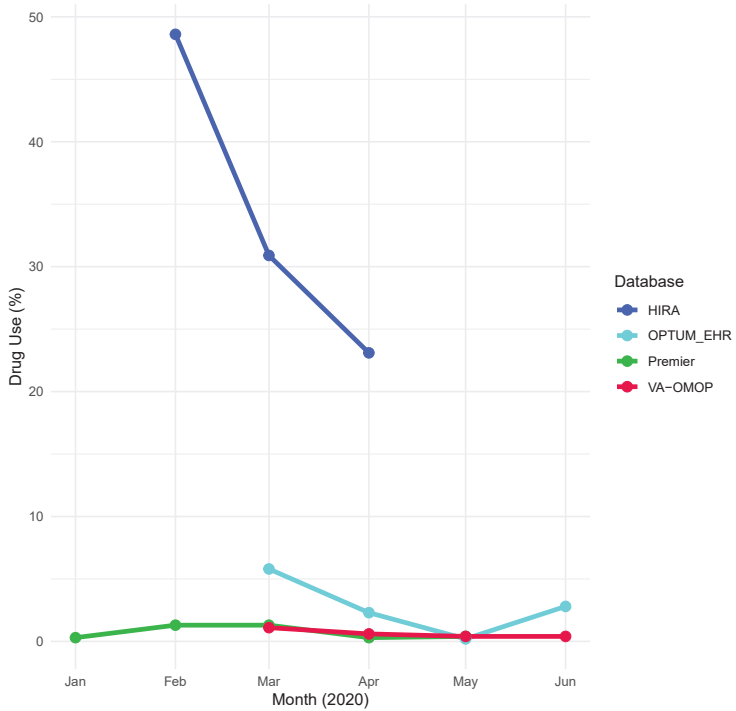

Ribavirin use (% of hospitalized patients with COVID-19) by month

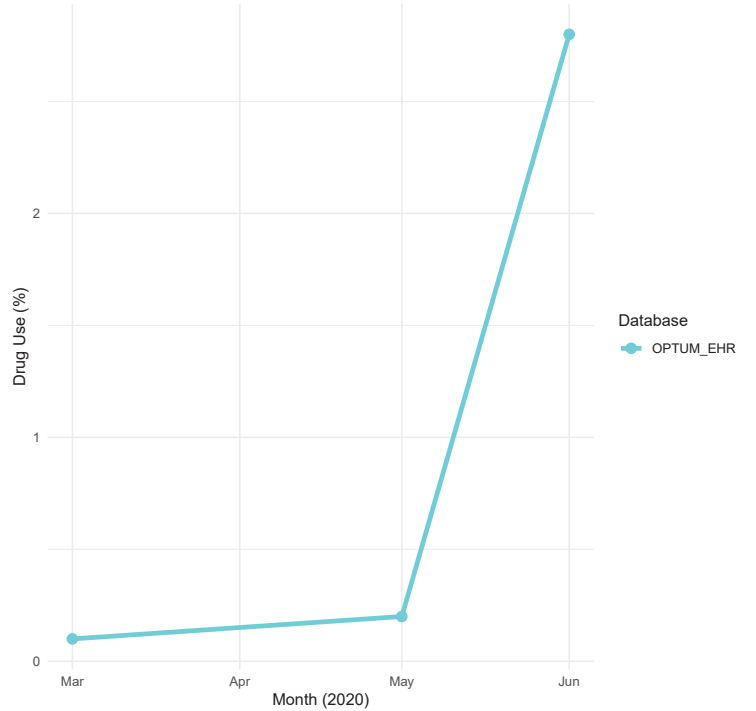

Hydroxychloroquine use (% of hospitalized patients with COVID-19) by month

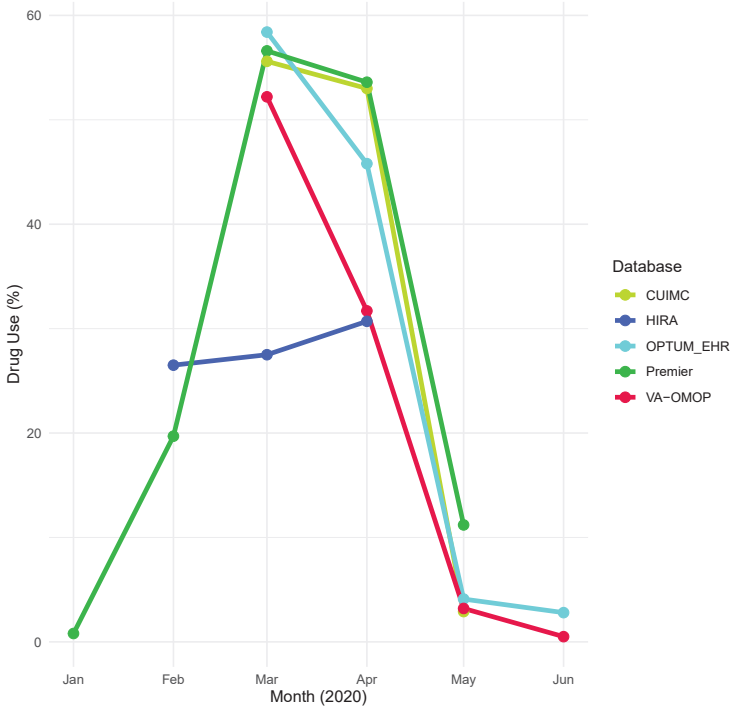

Ceftriaxone use (% of hospitalized patients with COVID-19) by month

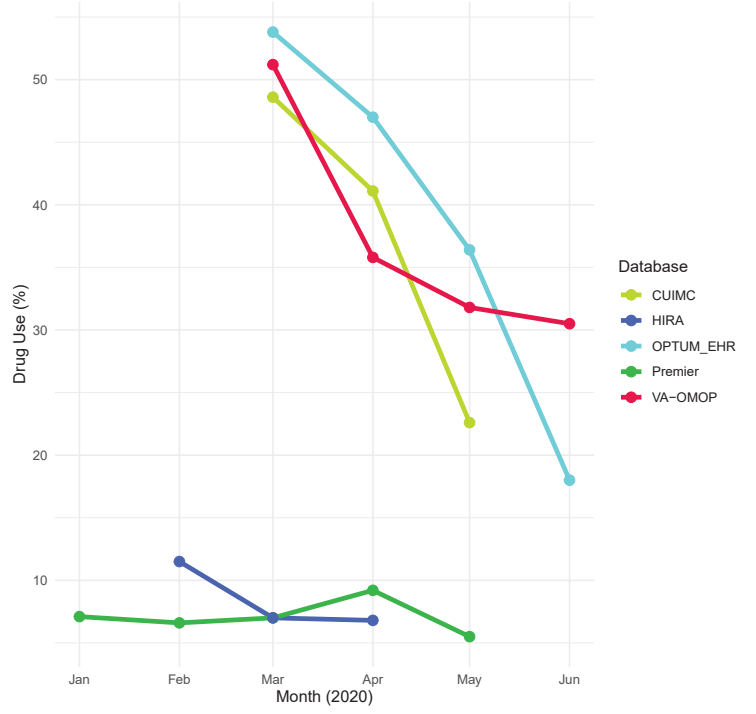

Ivermectin use (% of hospitalized patients with COVID-19) by month

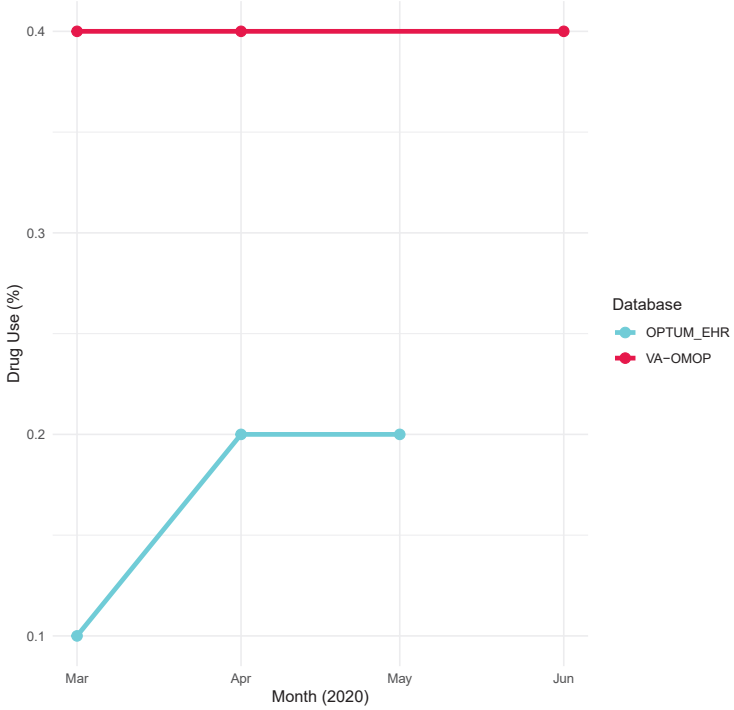

Oseltamivir use (% of hospitalized patients with COVID-19) by month

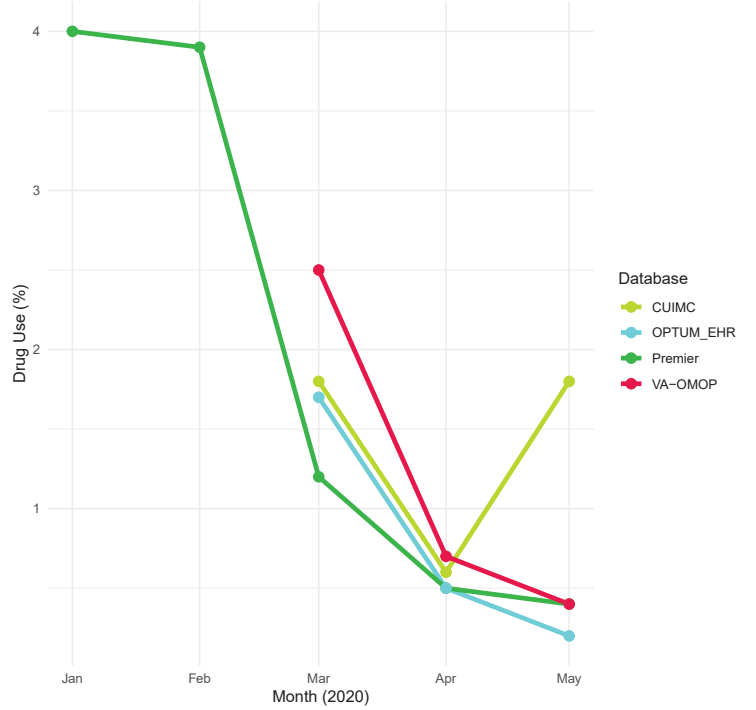

Vitamin C use (% of hospitalized patients with COVID-19) by month

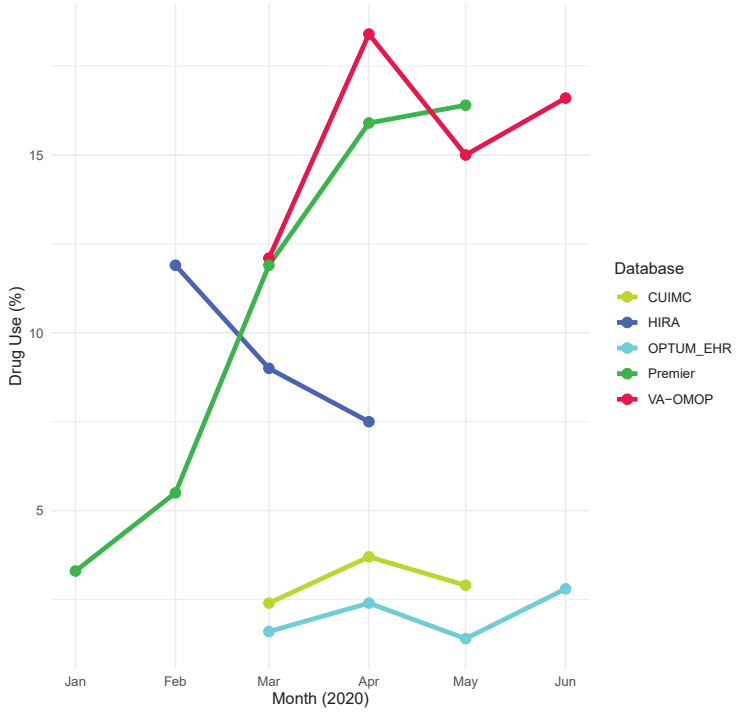

H2 receptor antagonist use (% of hospitalized patients with COVID-19) by month

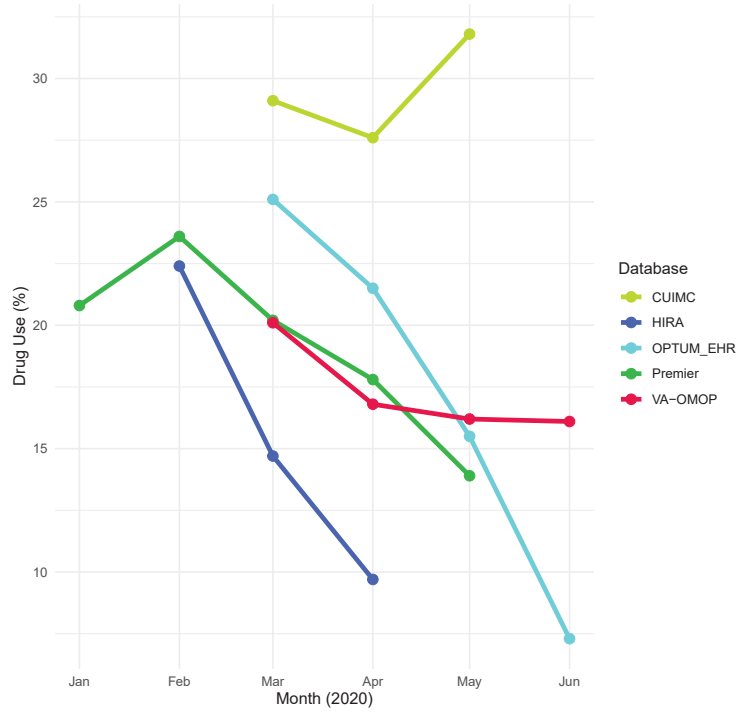

DPP-4 inhibitors use (% of hospitalized patients with COVID-19) by month

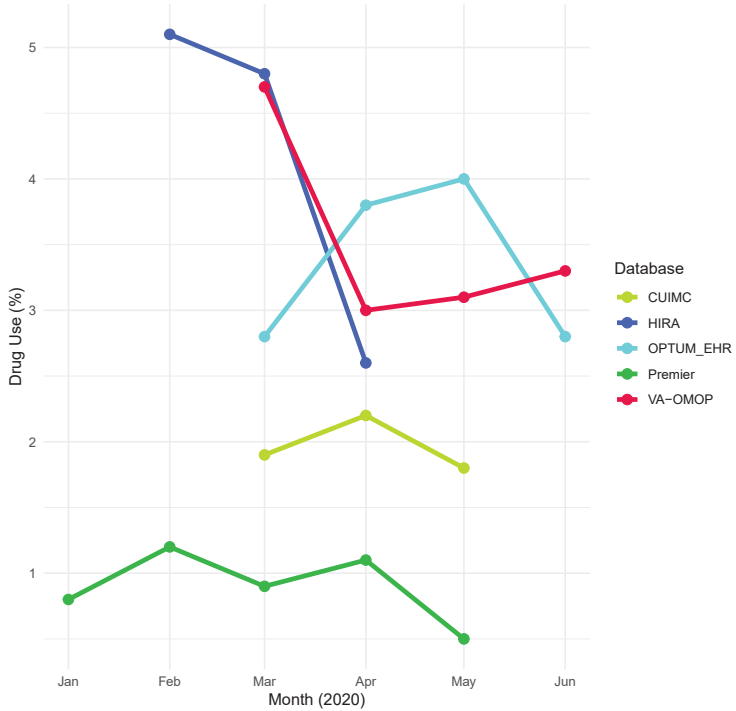

Vitamin D use (% of hospitalized patients with COVID-19) by month

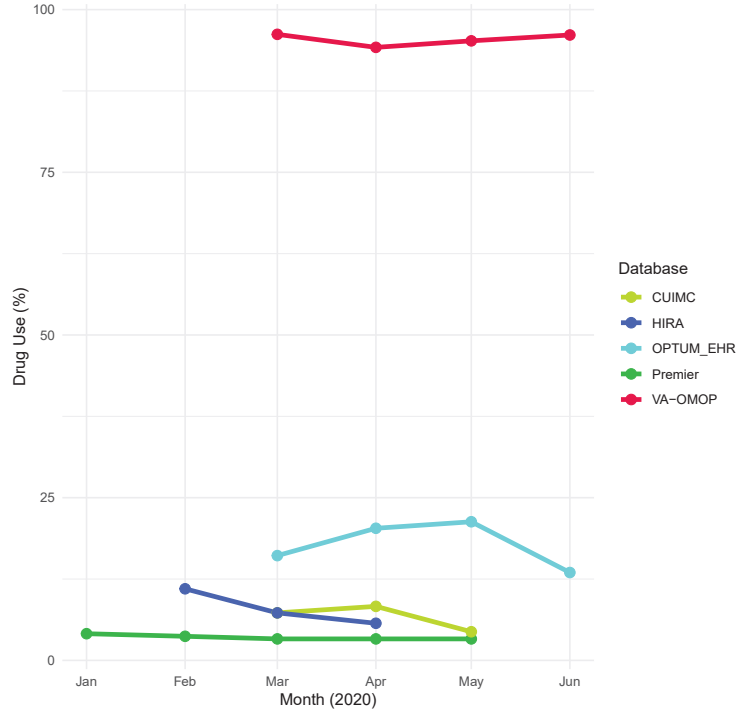



Immunoglobulins use (% of hospitalized patients with COVID-19) by month

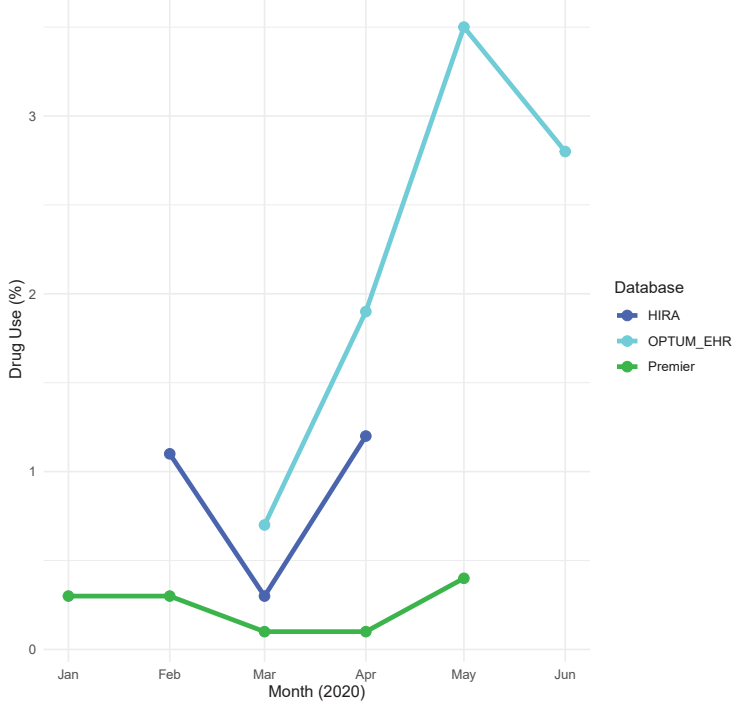

Alpha-1 blockers use (% of hospitalized patients with COVID-19) by month

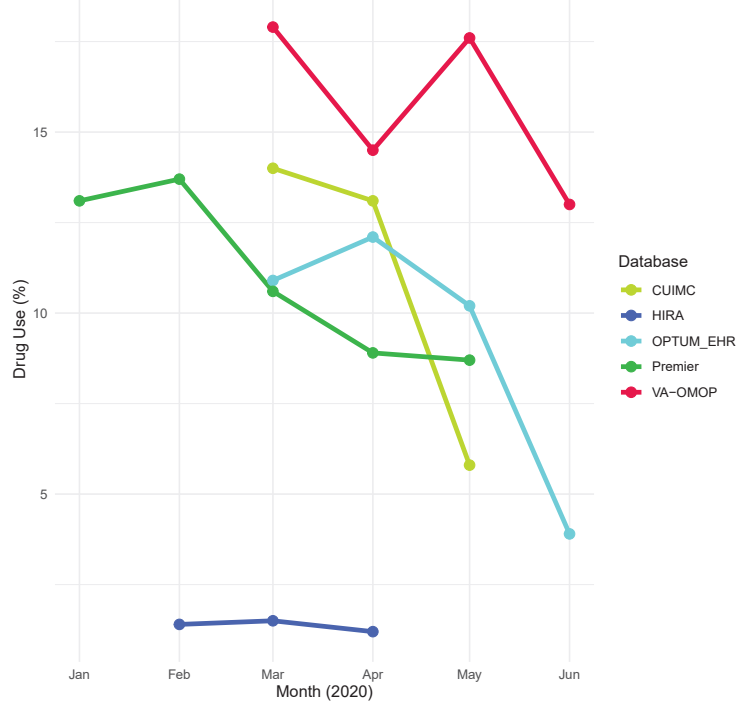

Supplement: Supplementary file [file 2020.09.15.20195545-2.pdf]
